# Supplementary material for: A novel LC-TQ-MS/MS method for quantifying mefenamic acid-NDSRI (N-nitroso drug substance-related impurity) in mefenamic acid tablet and pediatric suspension dosage forms: a comparative study with a cost-effective white, green, and blue UPLC method
Source: Royal Society of Chemistry journal article supplement (doi:10.1039/d4ra08425j), 2025-01-01
Supplement: d4ra08425j1.pdf [file d4ra08425j1.pdf]

**A novel LC-TQ-MS/MS method for quantifying Mefenamic acid-NDSRI (N-Nitroso drug substance-related impurity) in Mefenamic acid tablet and pediatric suspension dosage forms: A comparative study with cost-effective white, green, and blue UPLC method**

Srinivas Nakka<sup>1</sup>, Naresh Kumar Katari<sup>2</sup>, Siva Krishna Muchakayala<sup>1,3</sup>, Sreekantha Babu

Jonnalagadda<sup>2\*</sup>, Surendra Babu Manabolu Surya<sup>1\*</sup>

<sup>1</sup>*Department of Chemistry, School of Science, GITAM Deemed to be University, Hyderabad-502329, India.*

<sup>2</sup>*School of Chemistry & Physics, College of Agriculture, Engineering & Science, Westville Campus, University of KwaZulu-Natal, P Bag X 54001, Durban 4000, South Africa.*

<sup>3</sup>*Analytical Research and Development, Catalent Pharma Solutions, 1100 Enterprise Drive, Winchester, Kentucky-40391, USA.*

*\*Corresponding author:* Surendra Babu Manabolu Surya,

Department of Chemistry, School of Science, GITAM Deemed to be University

[smanabol@gitam.edu](mailto:smanabol@gitam.edu); [Jonnalagaddas@ukzn.ac.za](mailto:Jonnalagaddas@ukzn.ac.za)

**Fig. S1.** (A)<sup>1</sup>H-NMR and (B) mass spectra of MFA

**Fig. S2.** (A)<sup>1</sup>H-NMR and (B) mass spectra of NMFA

**Fig. S3.** Overlay UV spectra of MFA and N-MFA

**Fig. S4.** MRM chromatogram of NMFA quantifier-qualifier

**Fig. S5.** Typical system suitability test chromatogram

**Fig. S6.** The whiteness assessed results for the proposed (A) LC-TQ-MS/MS, and (B) UPLC method using the RGB12 Algorithm tool and the 12 principles of the WAC evaluation

**Table S1.** The results of the mobile phase and column selection experiments

**Table S2.** Summarized results of the robustness study

**Table S3.** Summary of N-MFA content in MFA tablet and Pediatric suspension formulations

**Table S4.** Analytical eco-scale penalty points

**Table S5.** GAPI and AGREE principles, method conditions, and score values

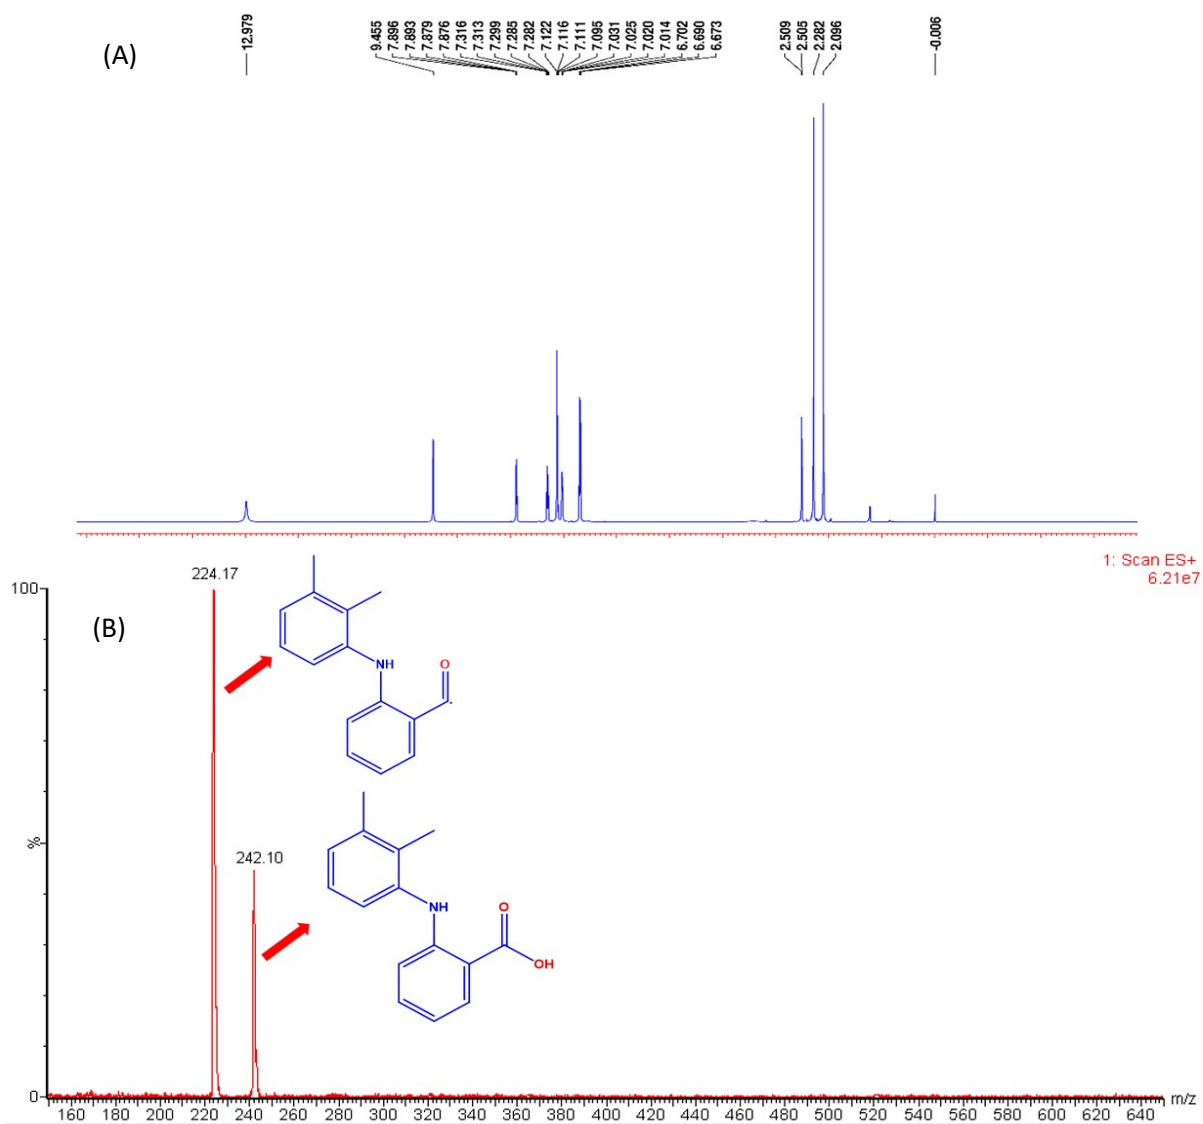

**Fig. S1** (A)<sup>1</sup>H-NMR and (B) mass spectra of MFA

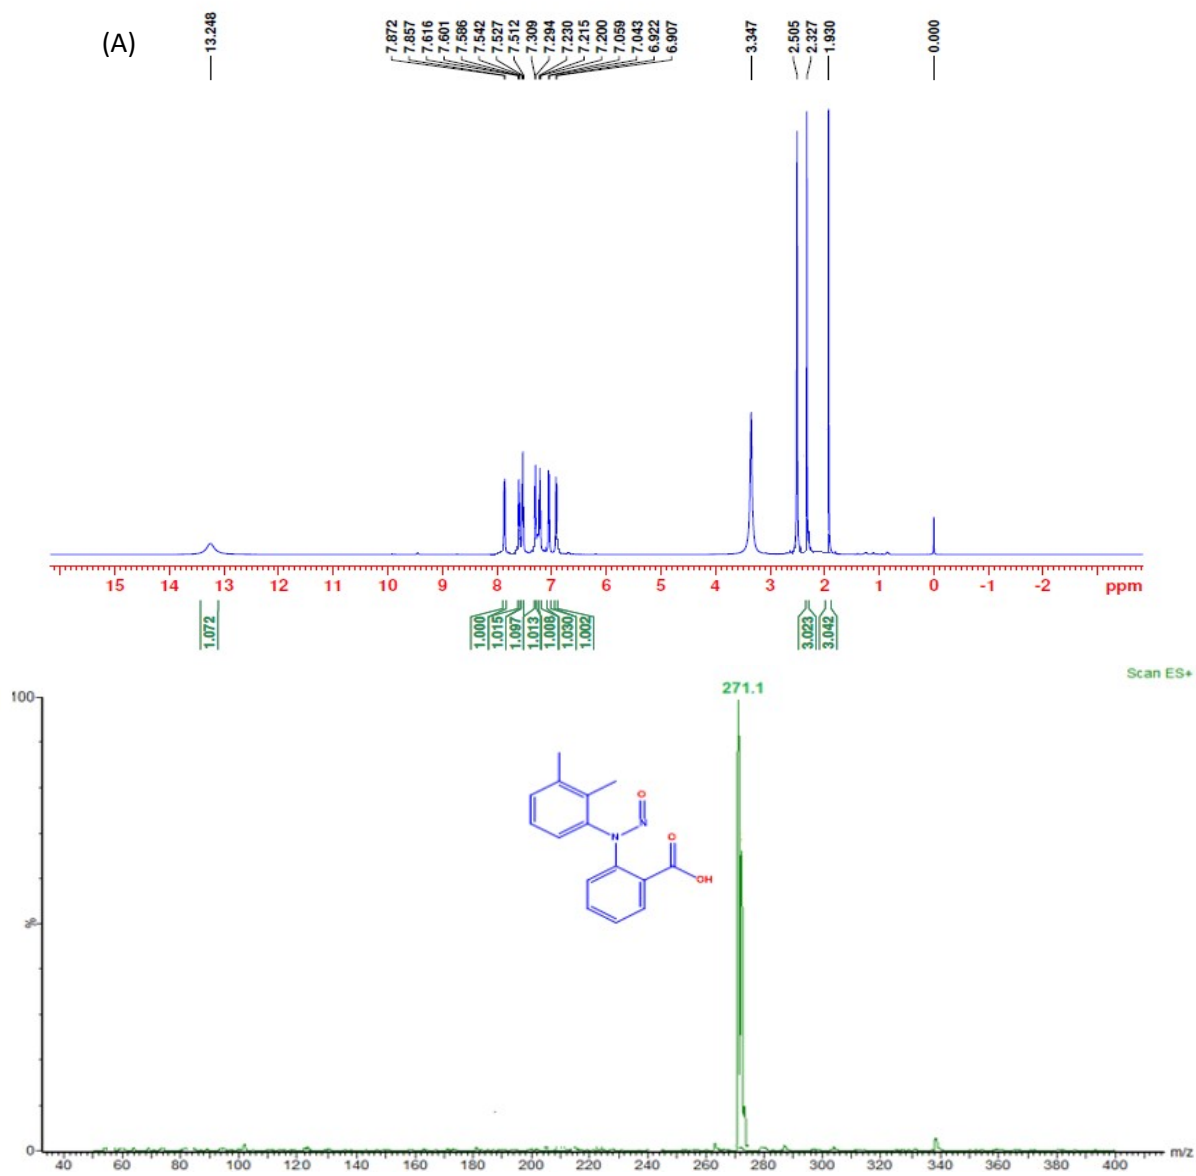

Fig. S2 (A)<sup>1</sup>H-NMR and (B) mass spectra of N-MFA

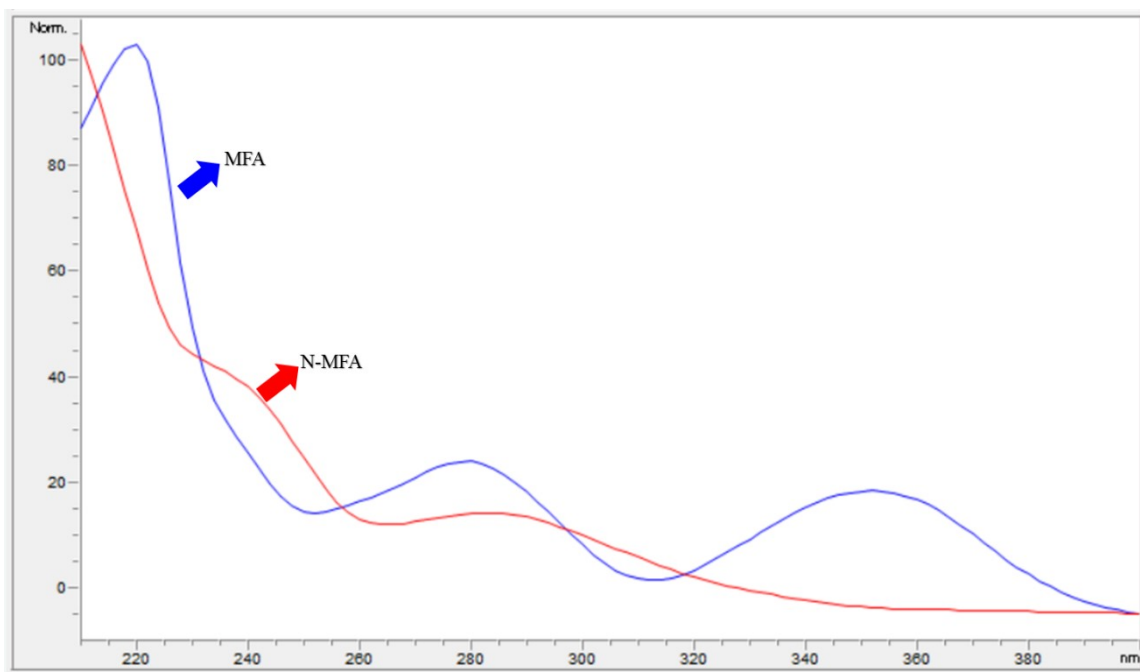

**Fig. S3.** Overlay UV spectra of MFA and N-MFA

**Fig. S4** MRM chromatogram of N-MFA quantifier-qualifier

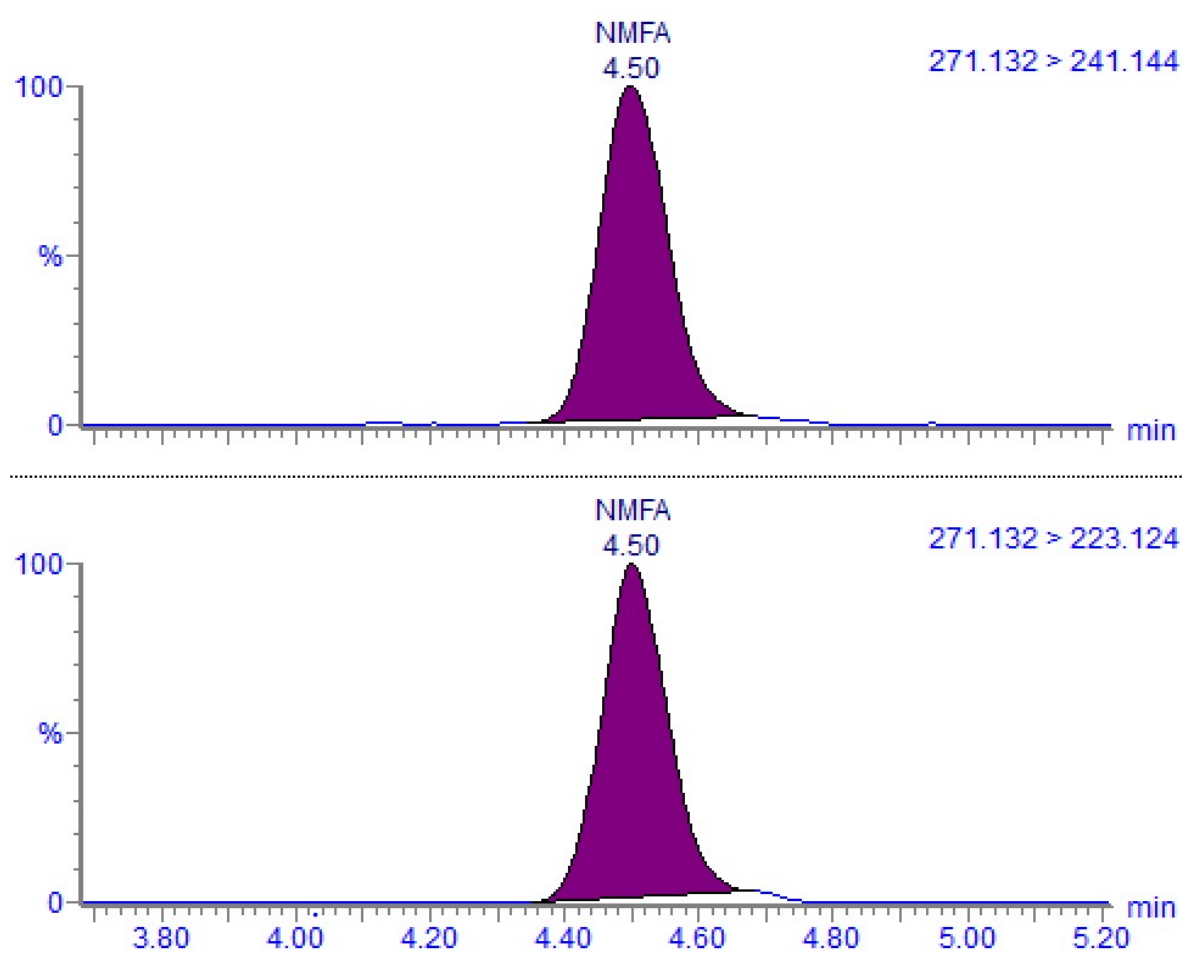

Fig. S5. Typical system suitability test chromatogram

Fig. 6 The whiteness assessed results for the proposed (A) LC-TQ-MS/MS, and (B) UPLC

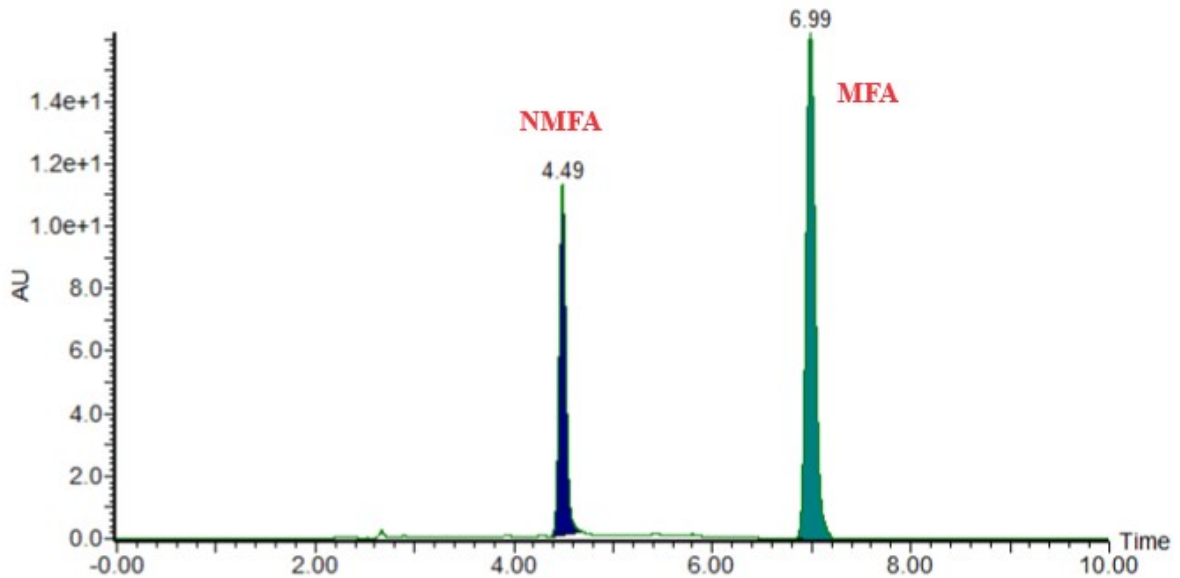

method using the RGB12 Algorithm tool and the 12 principles of the WAC evaluation

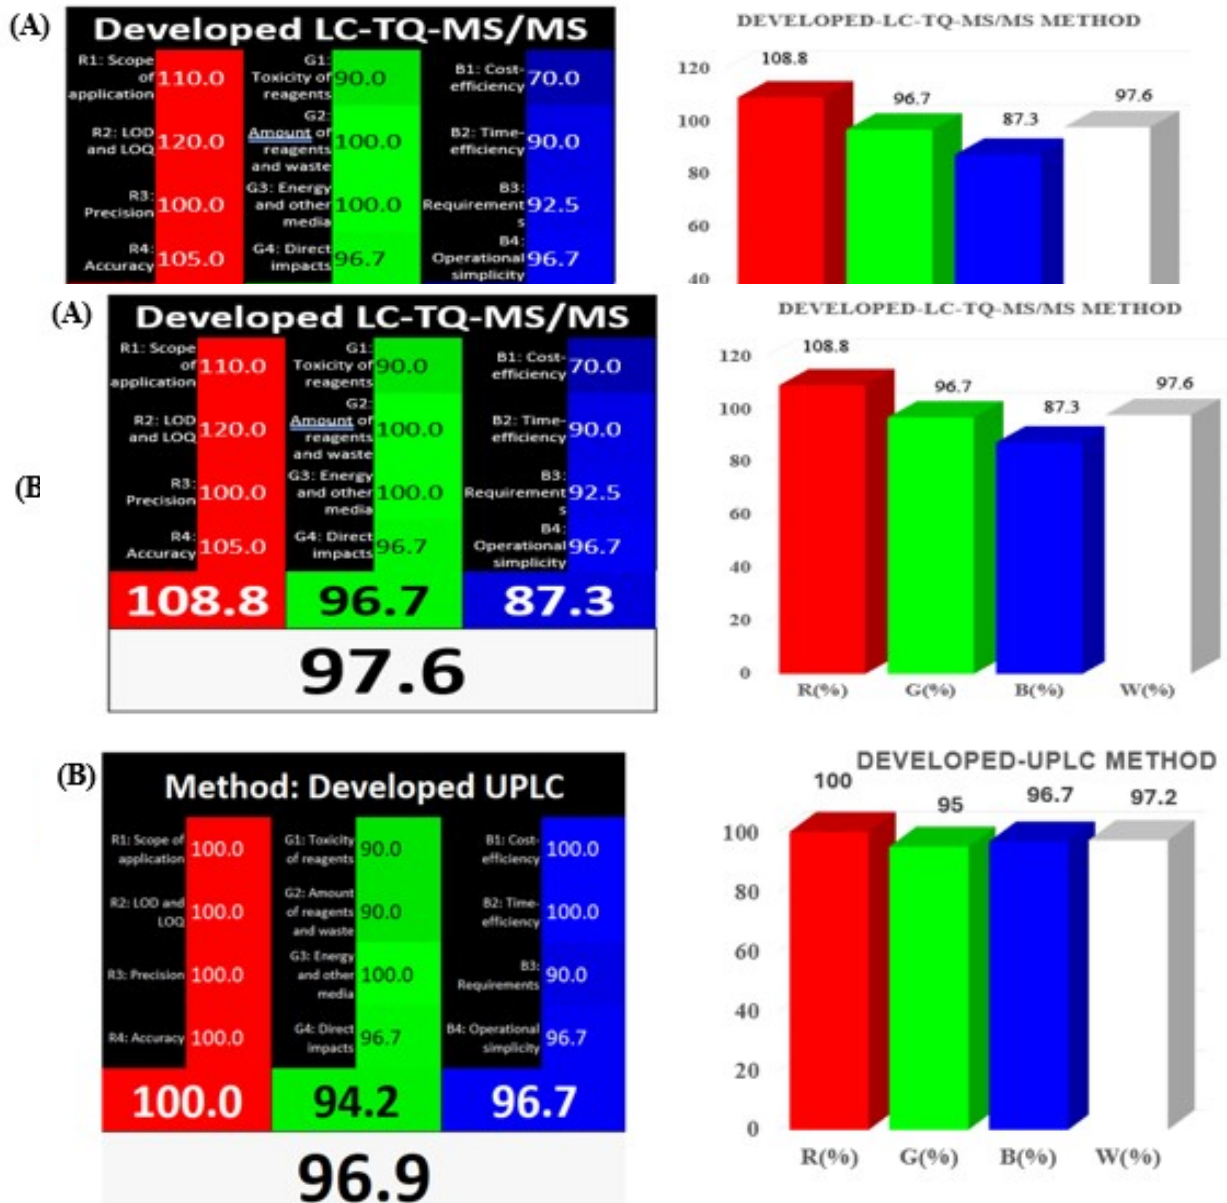

Table S1

The results of the mobile phase and column selection experiments

| Mobile phase                                      | Column/Column temp. (°C)                                    | Flow rate (mL/min)/Gradient program                                          | Observation                                                     | Interference                                |
|---------------------------------------------------|-------------------------------------------------------------|------------------------------------------------------------------------------|-----------------------------------------------------------------|---------------------------------------------|
| A: 10 mM ammonium acetate Buffer, B: Acetonitrile | Hypersil BDS C18 (150 × 2.1) mm, 5 μm/40 °C                 | 0.8 mL/min/(T(min))/%B: 0.0/10, 2.0/10, 8.0/90, 13.0/90, 13.1/10, & 15.0/10) | Improper peak shape was observed                                | Not acceptable                              |
| A: 10 mM ammonium formate Buffer, B: Acetonitrile | Symmetry C18 (100 × 4.6) mm, 3.5 μm/30 °C                   | 0.8 mL/min/(T(min))/%B: 0.0/10, 2.0/10, 8.0/90, 13.0/90, 13.1/10, & 15.0/10) | Improper peak shape and peaks are coeluted                      | Not acceptable                              |
| A: 0.1% formic acid Buffer, B: Acetonitrile       | Symmetry C18 (100 × 4.6) mm, 3.5 μm/40 °C                   | 0.8 mL/min/(T(min))/%B: 0.0/10, 2.0/10, 4.0/90, 10.0/90, 10.1/10, & 12.0/10) | Poor resolution b/n MFA and N-MFA (<1.5)                        | Not acceptable                              |
| A: 0.1% formic acid Buffer, B: Acetonitrile       | Hypersil BDS C18 (150 × 2.1) mm, 5 μm/40 °C                 | 0.8 mL/min/(T(min))/%B: 0.0/10, 2.0/10, 8.0/90, 13.0/90, 13.1/10, & 15.0/10) | Improper peak shape and Poor resolution b/n MFA and NMFA (<1.5) | Not acceptable                              |
| A: 0.1% formic acid Buffer, B: Acetonitrile       | XBridge BEH Shield RP18 Column (150 × 3.0 mm, 3.5 μm)/40 °C | 0.8 mL/min/(T(min))/%B: 0.0/10, 2.0/10, 4.0/90, 10.0/90, 10.1/10, & 12.0/10) | Resolution b/n MFA and N-MFA                                    | Acceptable and tried to reduce the run time |
| A: 0.1% formic Buffer, B: Acetonitrile            | XBridge BEH Shield RP18 Column (150 × 3.0 mm, 3.5 μm)/40 °C | 0.7 mL/min/(T(min))/%B: 0.0/10, 2.0/10, 4.0/80, 6.0/80, 6.1/30, and 8/10     | Resolution b/n MFA and N-MFA (10.35)                            | Acceptable (Current method)                 |

Table S2

Summarized results of the robustness study

| Altered condition                | Change      | NMFA content ( <i>ppm</i> ) |              | % absolute difference with respect to the nominal condition |      |
|----------------------------------|-------------|-----------------------------|--------------|-------------------------------------------------------------|------|
|                                  |             | LC-TQ-MS/MS                 | UPLC         | LC-TQ-MS/MS                                                 | UPLC |
|                                  | 0.09        | 62.55                       | 62.50        | 0.06                                                        | 0.06 |
| Concentration of formic acid (%) | <b>0.1</b>  | <b>62.59</b>                | <b>62.54</b> | -                                                           | -    |
|                                  | 0.11        | 62.52                       | 62.56        | 0.11                                                        | 0.03 |
|                                  | 0.8         | 62.49                       | 62.49        | 0.16                                                        | 0.08 |
| Flow rate (mL/min)               | <b>1.0</b>  | <b>62.59</b>                | <b>62.54</b> | -                                                           | -    |
|                                  | 1.2         | 62.52                       | 62.52        | 0.11                                                        | 0.03 |
|                                  | 38.0        | 62.53                       | 62.50        | 0.10                                                        | 0.06 |
| Column temp (°C)                 | <b>40.0</b> | <b>62.59</b>                | <b>62.54</b> | -                                                           | -    |
|                                  | 42.0        | 62.51                       | 62.51        | 0.13                                                        | 0.05 |
|                                  | 228         | 62.52                       | 62.52        | 0.11                                                        | 0.03 |
| Wavelength (nm)                  | <b>230</b>  | <b>62.59</b>                | <b>62.54</b> | -                                                           | -    |
|                                  | 232         | 62.57                       | 62.57        | 0.03                                                        | 0.05 |
|                                  | 950         | 62.52                       |              | 0.11                                                        |      |
| Desolvation gas flow (L/Hr)      | <b>900</b>  | <b>62.59</b>                |              | -                                                           |      |
|                                  | 850         | 62.57                       |              | 0.03                                                        |      |
| Desolvation gas temp. (°C)       | 500         | 62.52                       |              | 0.11                                                        |      |
|                                  | <b>450</b>  | <b>62.59</b>                |              | -                                                           |      |
|                                  | 400         | 62.57                       |              | 0.03                                                        |      |



Table S3  
 Summary of N-MFA content in MFA tablet and Pediatric suspension formulations

| Brand                | NMFA content (ppm) |       |
|----------------------|--------------------|-------|
|                      | LC-MS/MS           | UPLC  |
| Brand-A              | 3.36               | < LOQ |
|                      | 3.38               | < LOQ |
|                      | 3.29               | < LOQ |
| Brand-B              | 4.64               | 4.21  |
|                      | 4.27               | 4.51  |
|                      | 4.38               | 4.35  |
| Brand-C              | 3.31               | < LOQ |
|                      | 3.28               | < LOQ |
|                      | 3.19               | < LOQ |
| Pediatric suspension | 5.59               | 5.47  |
|                      | 5.70               | 5.81  |
|                      | 5.48               | 5.55  |

Table S4

## Analytical eco-scale penalty points

| Principle/ Reagents/Chemicals   | Penalty points |           |
|---------------------------------|----------------|-----------|
|                                 | LC-MS/MS       | UPLC      |
| Formic acid                     | 6              | 6         |
| Acetonitrile                    | 8              | 8         |
| LC-MS/UPLC                      | 3              | 1         |
| Occupational hazard             | 3              | 3         |
| Sample storage (RT)             | 0              | 0         |
| Sonicator                       | 1              | 1         |
| Waste                           | 5              | 5         |
| Waste Management                | 1              | 1         |
| The sum of total penalty points | 27             | 25        |
| <b>Analytical Eco-Scale</b>     | <b>73</b>      | <b>75</b> |

Table S5

## GAPI and AGREE principles, method conditions, and score values

| Pictogram Name              | GAPI                         |                                              | Principle                                    | AGREE                          |                                 |             |             |
|-----------------------------|------------------------------|----------------------------------------------|----------------------------------------------|--------------------------------|---------------------------------|-------------|-------------|
|                             | Sub Part no and name         | Method Condition                             |                                              | Method Condition               | Principle Score                 |             |             |
|                             |                              | LC-TQ-MS/MS                                  |                                              |                                | UPLC                            | LC-TQ-MS/MS | UPLC        |
| Sample sourcing             | 1. Collection                | Off-Line                                     | Off-Line                                     | 1. Sample treatment            | Off-line analysis               | 0.48        | 0.48        |
|                             | 2. Preservation              | None                                         | None                                         | 2. Sample Amount               | 0.5 g                           | 0.75        | 0.75        |
|                             | 3. Transport                 | None                                         | None                                         | 3. Device Positioning          | Off-line                        | 0.0         | 0.0         |
|                             | 4. Storage                   | Normal Condition                             | Normal Condition                             | 4. Sample Prep. Stages         | 3 or fewer                      | 1.0         | 1.0         |
| Method type                 | 5. Direct/Indirect           | Simple Preparation                           | Simple Preparation                           | 5. Automation, miniaturization | Automatic, none or miniaturized | 0.5         | 0.5         |
| Sample preparation          | 6. Scale of extraction       | nano                                         | macro                                        | 6. Derivatization              | NA                              | 1.0         | 1.0         |
|                             | 7. Solvents/Reagents         | Non- Green                                   | Non- Green                                   | 7. Waste                       | 15 mL                           | 0.29        | 0.29        |
|                             | 8. Additional treatments     | None                                         | None                                         | 8. Analysis Throughput         | 1                               | 1.0         | 1.0         |
| Reagents and chemicals used | 9. Amount                    | 15 mL                                        | 15 mL                                        | 9. Energy consumption          | LC-MS/UPLC                      | 0.0         | 1.0         |
|                             | 10. NFPA health hazard value | Acetonitrile:2, Orthophosphoric acid (OPA):3 | Acetonitrile:2, Orthophosphoric acid (OPA):3 | 10. Source of reagents         | No reagents                     | 1.0         | 1.0         |
|                             | 11. NFPA flammability value  | Acetonitrile:3, Orthophosphoric acid (OPA):0 | Acetonitrile:3, Orthophosphoric acid (OPA):0 | 11. Toxicity                   | 18 mL                           | 0.8         | 0.8         |
| Instrumentation             | 12. Energy usage             | <0.1 KWh per sample                          | <0.1 KWh per sample                          | 12. Operator safety            | Highly flammable                | 0.8         | 0.8         |
|                             | 13. Occupational hazard      | Vapours to atmosphere                        | Vapours to atmosphere                        | <b>Method AGREE Score</b>      |                                 | <b>0.63</b> | <b>0.68</b> |
|                             | 14. Waste                    | >10 mL                                       | >10 mL                                       |                                |                                 |             |             |
|                             | 15.                          | No Treatment                                 | No Treatment                                 |                                |                                 |             |             |
| Symbol                      | O-Present                    | Qualitative and Quantitative                 | Qualitative and Quantitative                 |                                |                                 |             |             |
